# Supplementary material for: Ecotoxicity of isosorbide acrylate and methacrylate monomers and corresponding polymers
Source: Royal Society of Chemistry journal article supplement (doi:10.1039/d2gc04178b), 2023-01-01
Supplement: d2gc04178b1.pdf [file d2gc04178b1.pdf]

## Supporting information

# Ecotoxicity of isosorbide acrylate and methacrylate monomers and corresponding polymers

Alina Ismagilova,<sup>†</sup> Livia Matt,<sup>†</sup> Patric Jannasch,<sup>†,§</sup> Veljo Kisand,<sup>\*,†</sup> and Lauri Vares<sup>\*,†</sup>

<sup>†</sup> Institute of Technology, University of Tartu, Nooruse 1, Tartu 50411, Estonia

<sup>§</sup> Department of Chemistry, Lund University, Box 124, Lund 221 00, Sweden

\*E-mail: veljo.kisand@ut.ee, lauri.vares@ut.ee

## Table of Contents

|                                                                                                                                                                                                 |           |
|-------------------------------------------------------------------------------------------------------------------------------------------------------------------------------------------------|-----------|
| <b>Synthesis of monomers and polymers.....</b>                                                                                                                                                  | <b>3</b>  |
| <b>NMR spectra of monomers and polymers.....</b>                                                                                                                                                | <b>4</b>  |
| Figure S1. <sup>13</sup> C and <sup>1</sup> H NMR spectra of IM in CDCl <sub>3</sub> . ....                                                                                                     | 4         |
| Figure S2. <sup>13</sup> C and <sup>1</sup> H NMR spectra of IMA in CDCl <sub>3</sub> . ....                                                                                                    | 4         |
| Figure S3. <sup>13</sup> C and <sup>1</sup> H NMR spectra of IA in CDCl <sub>3</sub> . ....                                                                                                     | 5         |
| Figure S4. <sup>13</sup> C and <sup>1</sup> H NMR spectra of IAA in CDCl <sub>3</sub> . ....                                                                                                    | 5         |
| Figure S5. <sup>13</sup> C and <sup>1</sup> H NMR spectra of PIM in DMSO- <i>d</i> <sub>6</sub> . ....                                                                                          | 6         |
| Figure S6. <sup>13</sup> C and <sup>1</sup> H NMR spectra of PIMA in CDCl <sub>3</sub> . ....                                                                                                   | 6         |
| Figure S7. <sup>13</sup> C and <sup>1</sup> H NMR spectra of PIA in DMSO- <i>d</i> <sub>6</sub> . ....                                                                                          | 7         |
| Figure S8. <sup>13</sup> C and <sup>1</sup> H NMR spectra of PIAA in DMSO- <i>d</i> <sub>6</sub> . ....                                                                                         | 7         |
| <b>SEC curves of polymers .....</b>                                                                                                                                                             | <b>8</b>  |
| Figure S9. SEC curves in DMF with differential refractive index (dRI) detector of polymers PIM(a,b). ....                                                                                       | 8         |
| Figure S10. SEC curves in THF with differential refractive index (dRI) detector of polymers PIMA(a-c). ....                                                                                     | 9         |
| Figure S11. SEC curves in DMF with differential refractive index (dRI) detector of polymers PIA(a-c). ....                                                                                      | 9         |
| Figure S12. SEC curve in DMF with differential refractive index (dRI) detector of polymer PIAA. ....                                                                                            | 10        |
| <b>Solubility of the test compounds in the mixture of water and DMSO.....</b>                                                                                                                   | <b>11</b> |
| Table S1. Name, chemical structure, abbreviation, and solubility in water/DMSO mixture of the tested compounds. ....                                                                            | 11        |
| <b>DMSO ecotoxicity tests .....</b>                                                                                                                                                             | <b>13</b> |
| Table S2. Ecotoxicology results of DMSO on bacterial tests with <i>E. coli</i> and <i>A. fischeri</i> . ....                                                                                    | 13        |
| <b>Prediction of EC<sub>50</sub> for monomers.....</b>                                                                                                                                          | <b>14</b> |
| Table S3. ECOSAR toxicity prediction for monomers. ....                                                                                                                                         | 14        |
| <b>Values of the mean effective concentration (EC<sub>50</sub>, mg L<sup>-1</sup>) of the tested monomers and polymers with 95% CI values.....</b>                                              | <b>15</b> |
| Table S4. EC <sub>50</sub> values of the tested monomers and polymers with 95% CI values. ....                                                                                                  | 15        |
| <b>Statistical analysis by one-way ANOVA.....</b>                                                                                                                                               | <b>16</b> |
| Table S5. One-way ANOVA and post hoc pairwise comparison (Tukey test) between EC <sub>50</sub> values of studied monomers and polymers. <i>p</i> values are adjusted for multiple testing. .... | 16        |
| <b>Toxi-Chromo Test<sup>TM</sup>: chromo inhibition test with bacteria <i>Escherichia coli</i>.....</b>                                                                                         | <b>17</b> |
| Table S6. Ecotoxicology results of the test compounds on bacteria <i>E. coli</i> . ....                                                                                                         | 17        |

|                                                                                                                   |           |
|-------------------------------------------------------------------------------------------------------------------|-----------|
| <b>Water-TOX™ STD: luminescence inhibition test with bacteria <i>Aliivibrio fischeri</i> .....</b>                | <b>21</b> |
| Table S7. Ecotoxicology results of the test compounds on bacteria <i>A. fischeri</i> . .....                      | 21        |
| <b>DuckWeed Toxkit F: growth inhibition test with vascular plants <i>Spirodela polyrhiza</i>...</b>               | <b>25</b> |
| Table S8. Ecotoxicology results of the test compounds on vascular plants <i>S. polyrhiza</i> . .....              | 25        |
| <b>Thamnotoxkit F: crustacean toxicity screening test with invertebrates <i>Thamnocephalus platyurus</i>.....</b> | <b>28</b> |
| Table S9. Ecotoxicology results of the test compounds on invertebrates <i>T. platyurus</i> . .....                | 28        |
| <b>Technical Data Sheet of CHP BAR 1400.....</b>                                                                  | <b>29</b> |
| <b>References .....</b>                                                                                           | <b>30</b> |

## Synthesis of monomers and polymers

Isosorbide 5-methacrylate (**IM**), isosorbide 5-methacrylate-2-acetate (**IMA**) and the corresponding poly(isosorbide 5-methacrylate) (**PIM**) and poly(isosorbide 5-methacrylate-2-acetate) (**PIMA**) were prepared according to the procedure reported by Matt et al.<sup>1</sup> Isosorbide 5-methacrylate propionate (**IMP**) and the corresponding butyrate (**IMB**) were synthesized according to Laanesoo and co-workers.<sup>2</sup> Isosorbide 5-acrylate (**IA**), isosorbide 5-acrylate-2-acetate (**IAA**) and the corresponding poly(isosorbide 5-acrylate) (**PIA**) and poly(isosorbide 5-acrylate-2-acetate) (**PIAA**) were prepared according to the procedures reported by Nonque et al.<sup>3</sup> and Gallagher et al.,<sup>4</sup> respectively.

The polymers were purified from unreacted monomers and initiator by precipitation. **PIM** and **PIMA** were isolated by precipitation in cold MeOH, while **PIA** was precipitated in a mixture of Et<sub>2</sub>O/*i*-PrOH (4:1), and **PIAA** in Et<sub>2</sub>O. The solids were filtrated using glass-filters and washed 1-2 times with small volumes of the same solvent to remove traces of the monomer. The polymers in the form of white powders polymers were carefully collected from the glass filters and dried under reduced pressure.

The solubility of the monomers and the polymers was investigated in H<sub>2</sub>O. Small samples (about 5 mg) of the compounds were mixed with H<sub>2</sub>O (1 mL). The mixture was stirred for ca 1 h at room temperature. If the samples were found to be completely dissolved, they were considered as soluble; if not, they were considered as insoluble.

Monomers and polymers were characterized by NMR (<sup>1</sup>H and <sup>13</sup>C). Based on <sup>1</sup>H NMR, the purity of the monomers was assessed to be ≥98%. Molecular weight of polymers was determined by SEC.

## NMR spectra of monomers and polymers

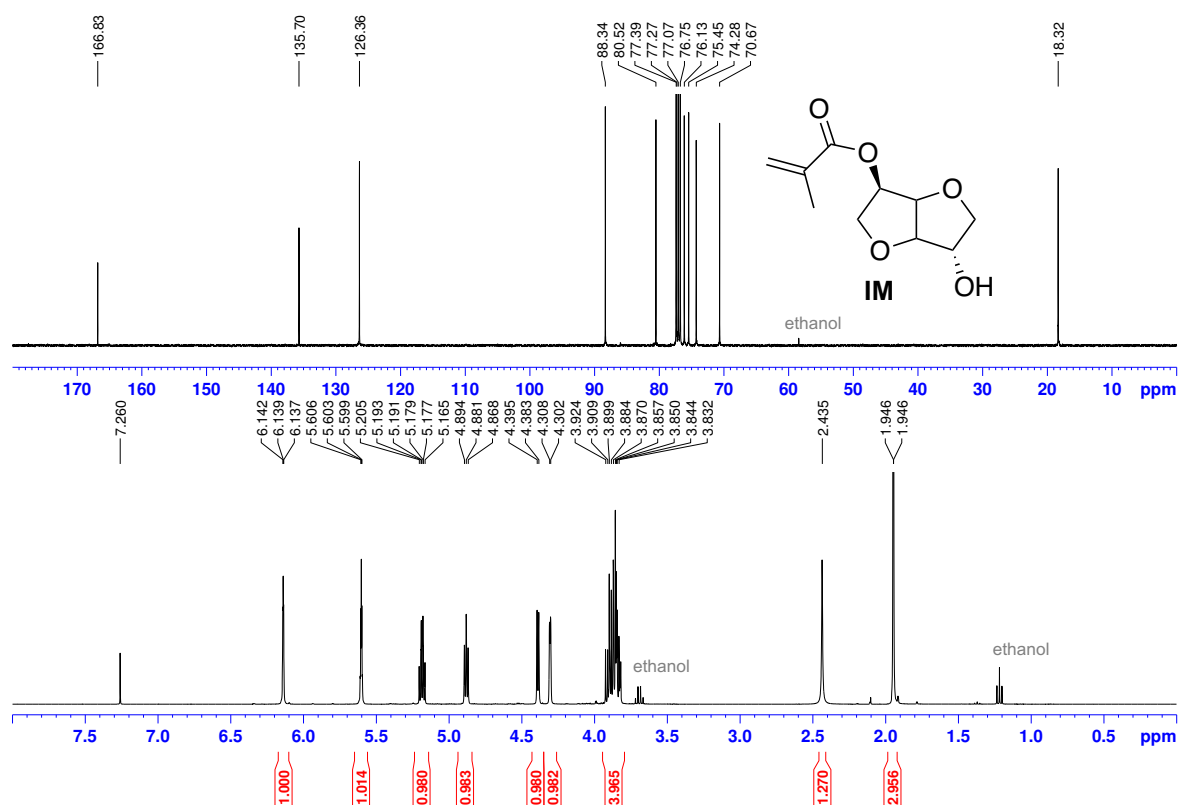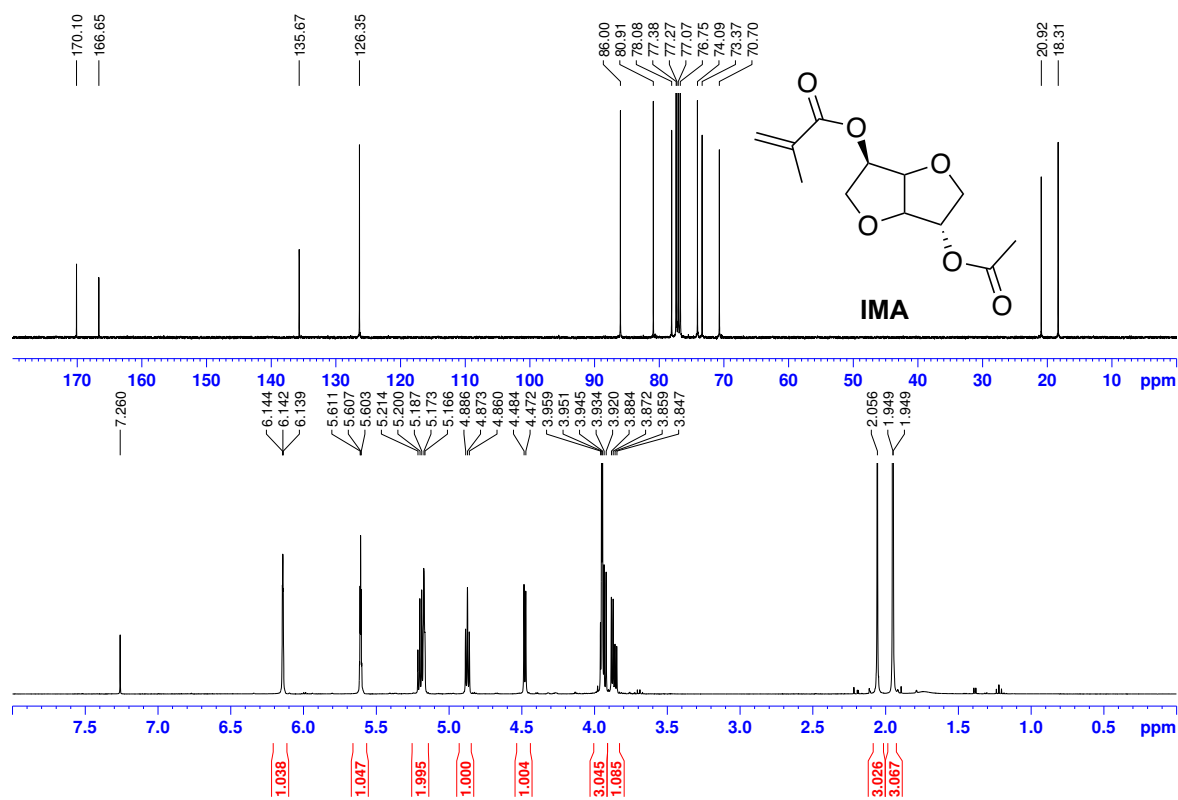

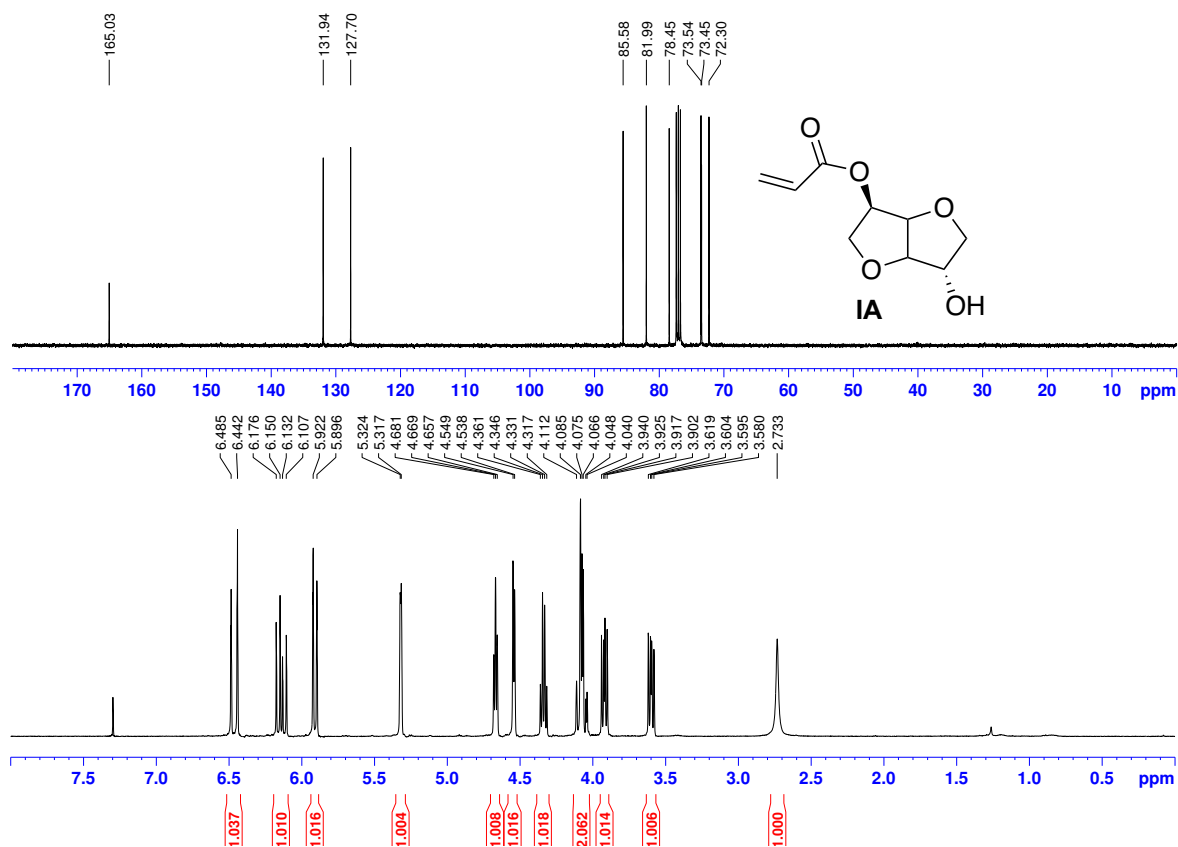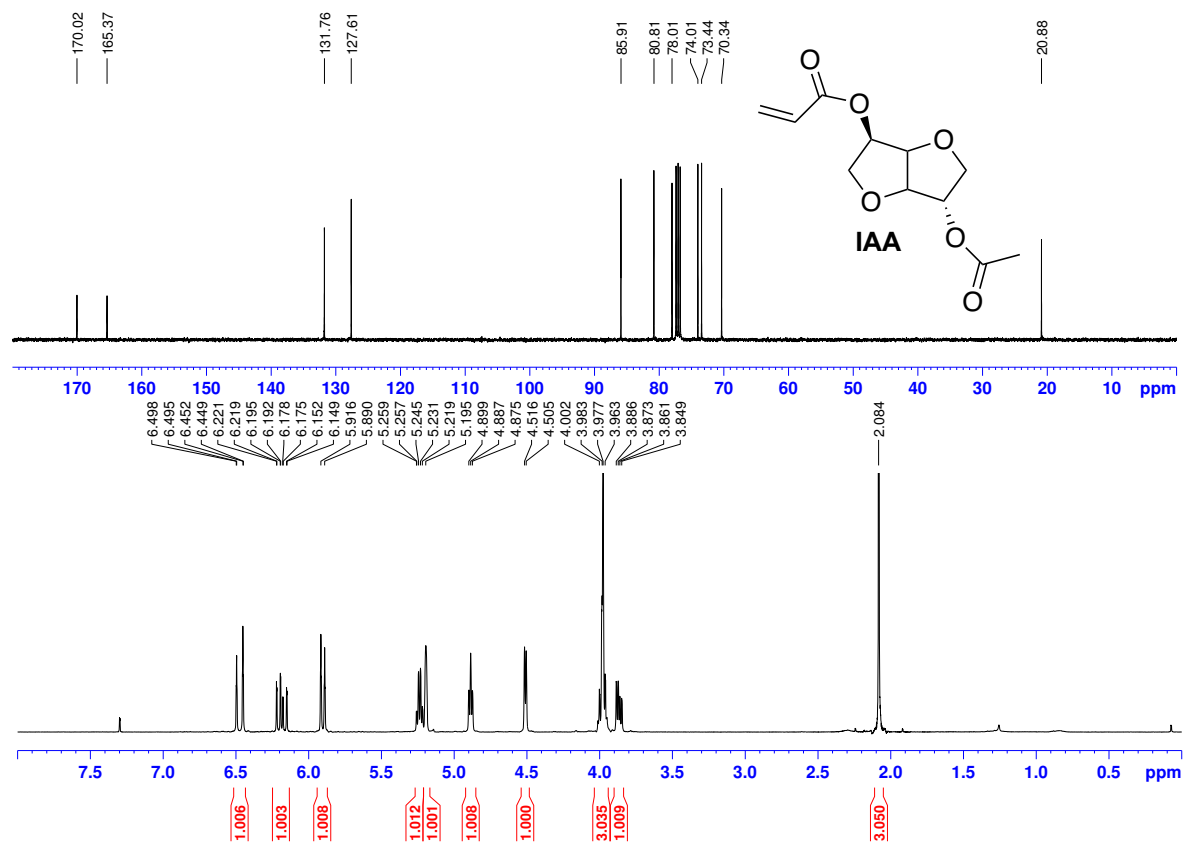

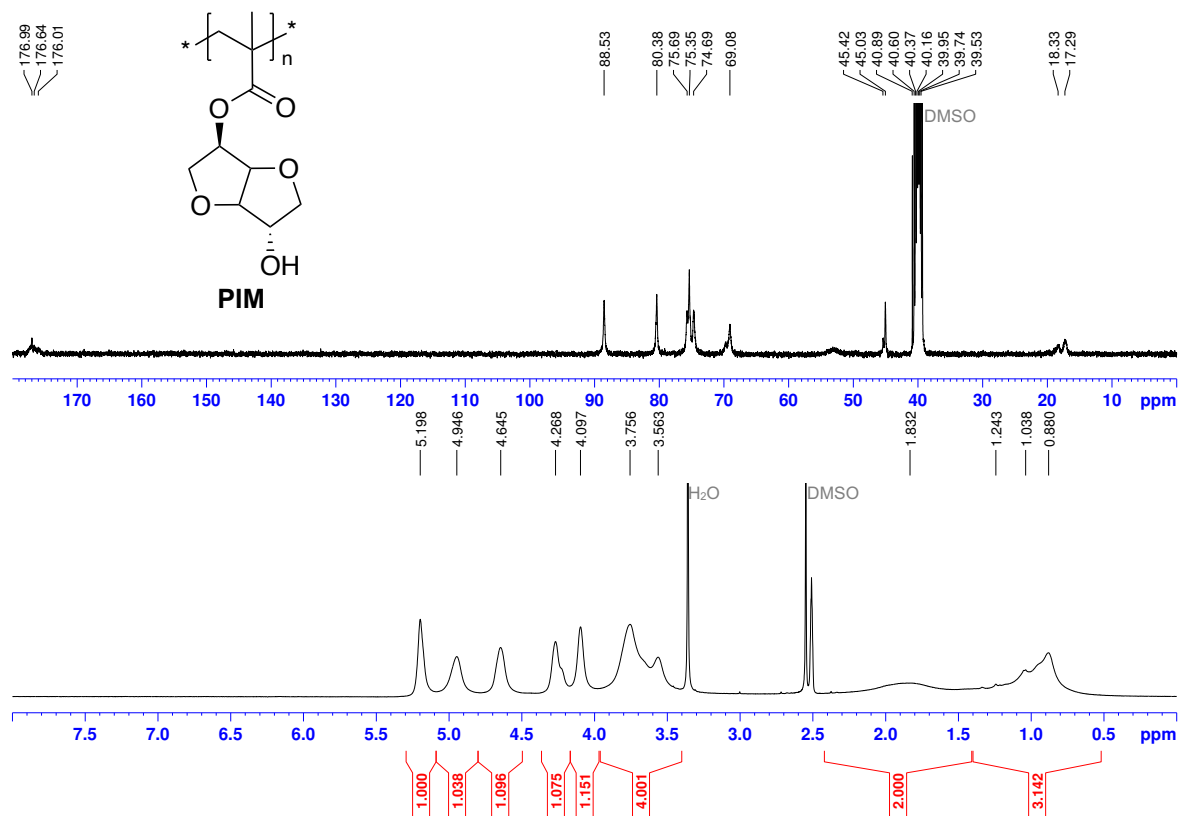

**Figure S5.**  $^{13}\text{C}$  and  $^1\text{H}$  NMR spectra of **PIM** in  $\text{DMSO-}d_6$ .

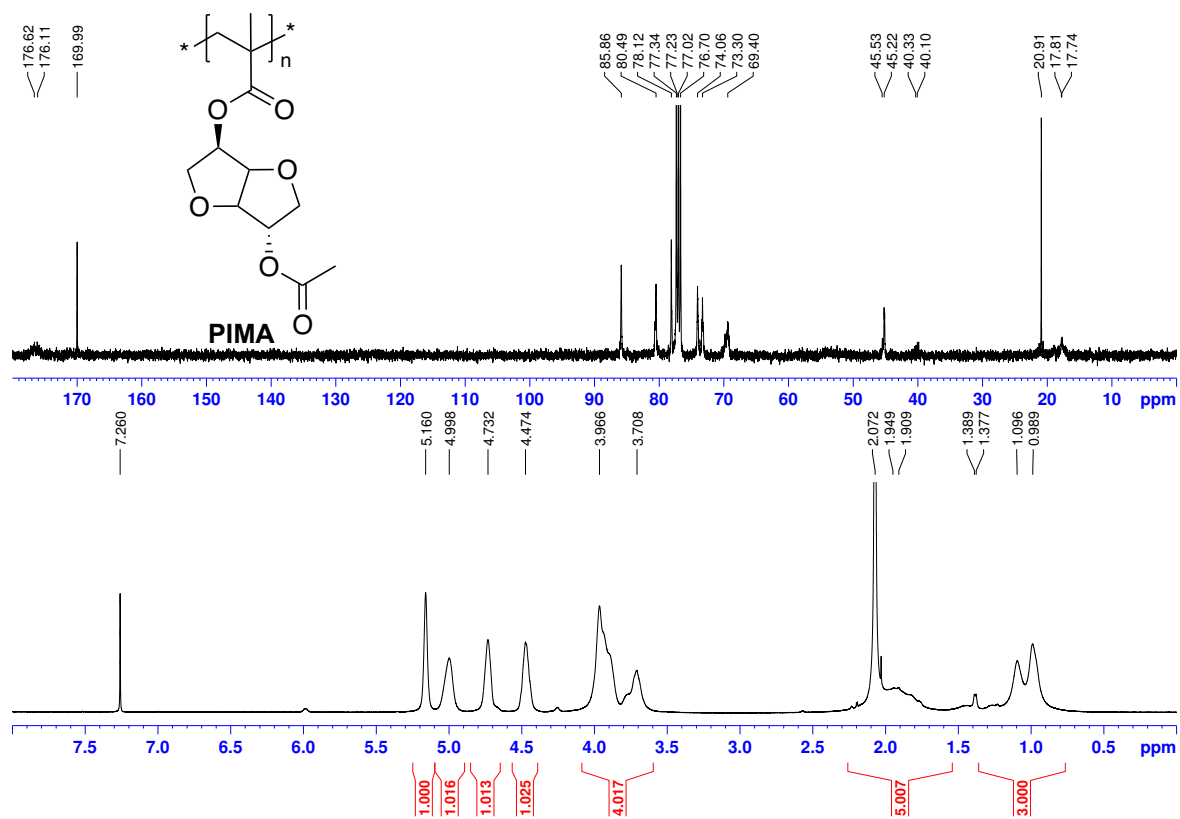

**Figure S6.**  $^{13}\text{C}$  and  $^1\text{H}$  NMR spectra of **PIMA** in  $\text{CDCl}_3$ .

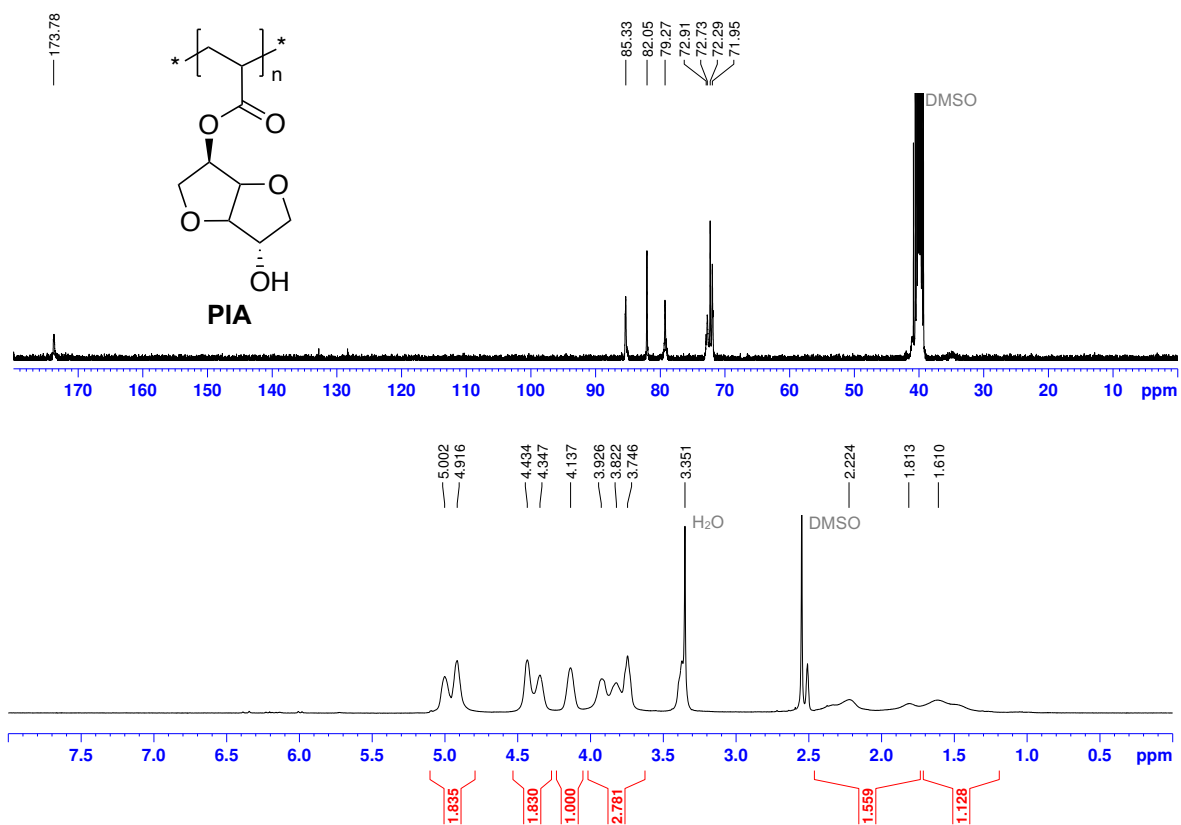

Figure S7. <sup>13</sup>C and <sup>1</sup>H NMR spectra of PIA in DMSO-*d*<sub>6</sub>.

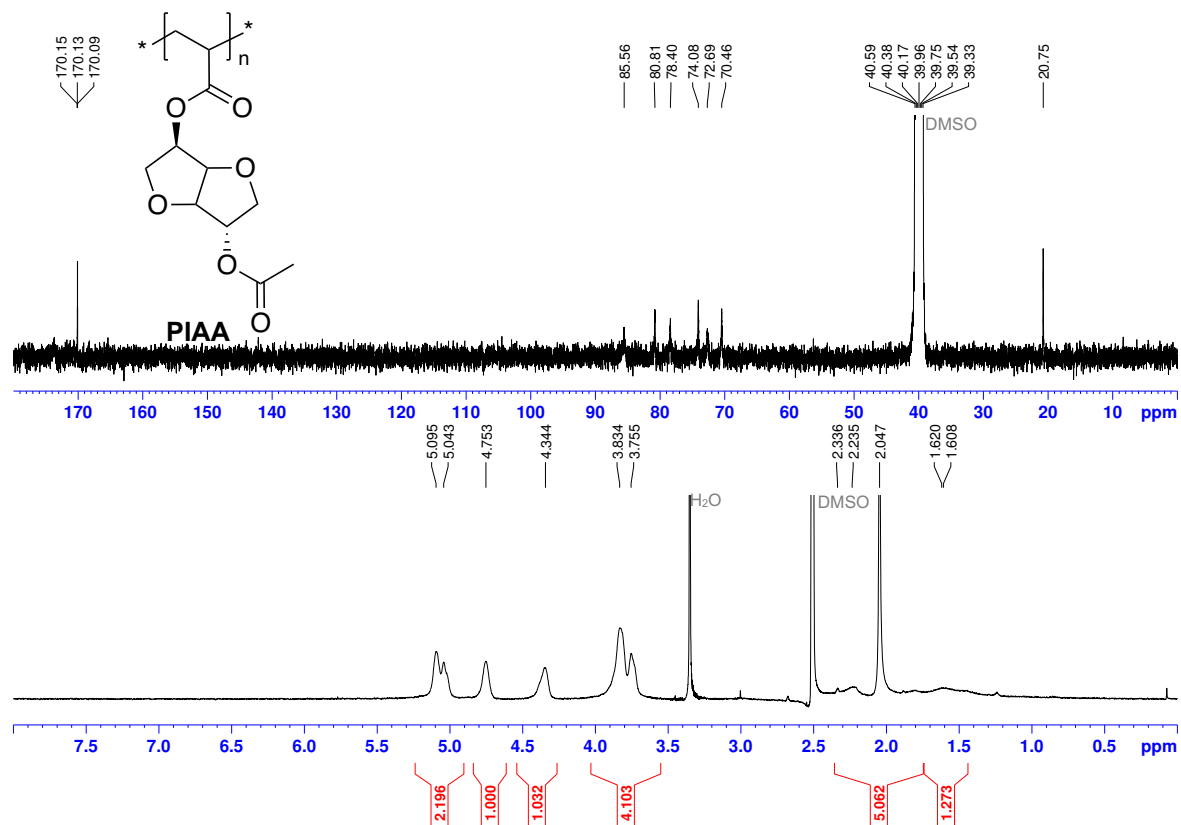

Figure S8. <sup>13</sup>C and <sup>1</sup>H NMR spectra of PIAA in DMSO-*d*<sub>6</sub>.

## SEC curves of polymers

The molecular weights of the polymethacrylates and polyacrylates were determined by size-exclusion chromatography (SEC) in THF or in DMF. The SEC setup included three Shodex columns coupled in series (KF-805, -804, and -802.5) for THF or two Shodex columns coupled in series (KD-804, -802.5) for DMF situated in a Shimadzu CTO-20A prominence column oven, a Shimadzu RID-20A refractive index detector, with Shimadzu LabSolution software. Samples were run at 40 °C in THF and at an elution rate of 1 mL min<sup>-1</sup>, and at 50 °C in DMF and at an elution rate of 0.5 mL min<sup>-1</sup>. Calibration was done by using poly(ethylene oxide) standards ( $M_n = 3\ 860, 21\ 160, 49\ 390, \text{ and } 96\ 100\ \text{g mol}^{-1}$ ) for both solvents.

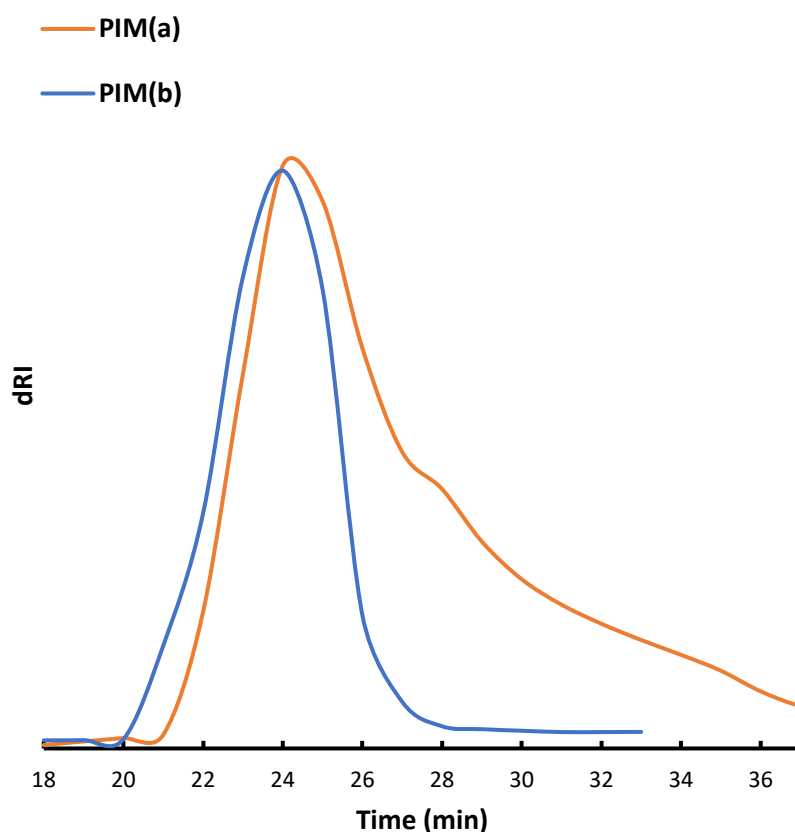

**Figure S9.** SEC curves in DMF with differential refractive index (dRI) detector of polymers PIM(a,b).



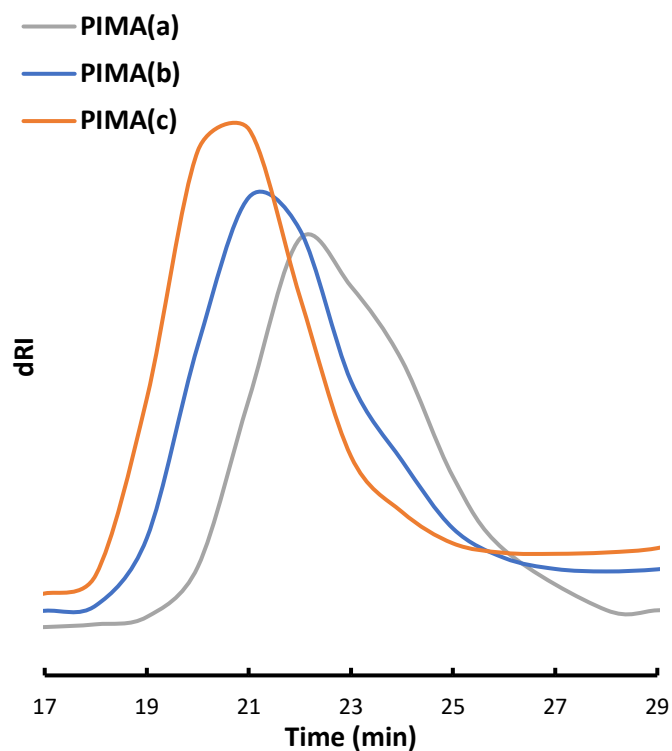

**Figure S10.** SEC curves in THF with differential refractive index (dRI) detector of polymers PIMA(a-c).

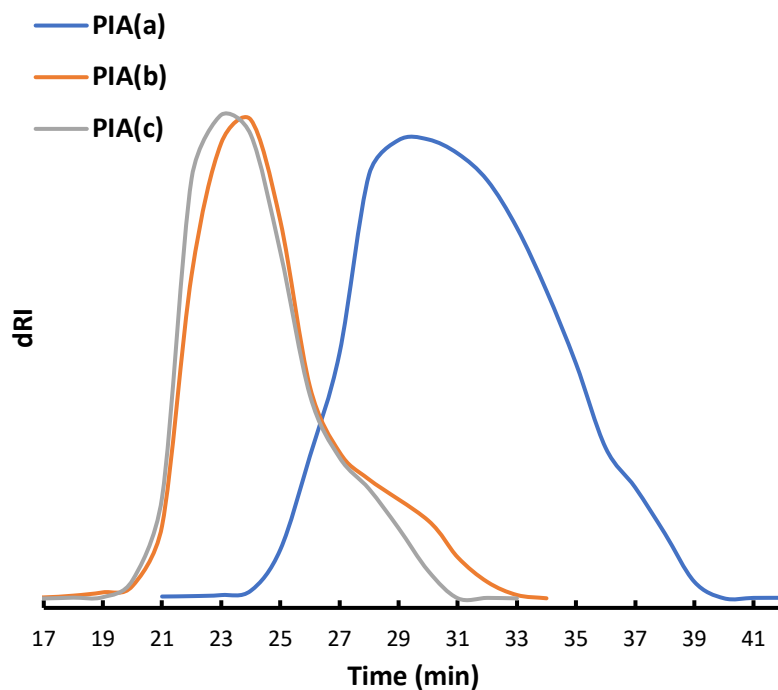

**Figure S11.** SEC curves in DMF with differential refractive index (dRI) detector of polymers PIA(a-c).

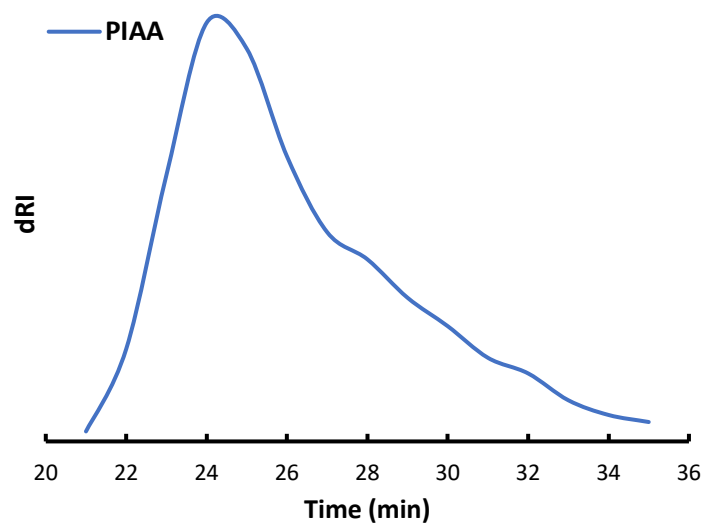

**Figure S12.** SEC curve in DMF with differential refractive index (dRI) detector of polymer PIAA.

## Solubility of the test compounds in the mixture of water and DMSO

First, we attempted to dissolve all compounds in water without the addition of DMSO. Monomers **IM** and **IA** with hydroxyl groups in the position 2 in isosorbide structure easily dissolved in water, as well as polymer **PIA** obtained from monomer **IA**. For all other compounds, the mixture of DMSO/water was necessary for full solubility, and we used the lowest possible DMSO content. The solubility of the monomers and the polymers was investigated in H<sub>2</sub>O. Small samples (about 5 mg) of the compounds were mixed with H<sub>2</sub>O (1 mL). The mixture was stirred for ca 1 h at room temperature. If the samples were found to be completely dissolved, they were considered as soluble; if not, they were considered as insoluble.

**Table S1.** Name, chemical structure, abbreviation, and solubility in water/DMSO mixture of the tested compounds.

| Name                                | Structure                                                                           | Abbreviation | DMSO, % | Water, % | Highest tested concentration, mg mL <sup>-1</sup> |
|-------------------------------------|-------------------------------------------------------------------------------------|--------------|---------|----------|---------------------------------------------------|
| Isosorbide 5-methacrylate           | 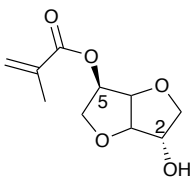 | <b>IM</b>    | -       | 100      | 25                                                |
| Isosorbide 5-methacrylate-2-acetate |  | <b>IMA</b>   | 15      | 85       | 40                                                |
| Isosorbide 5-acrylate               |  | <b>IA</b>    | -       | 100      | 10                                                |
| Isosorbide 5-acrylate-2-acetate     |  | <b>IAA</b>   | 15      | 85       | 4                                                 |

|                                                    |                                                                                     |             |    |     |       |
|----------------------------------------------------|-------------------------------------------------------------------------------------|-------------|----|-----|-------|
| Poly(isosorbide<br>5-methacrylate)                 | 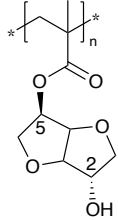   | <b>PIM</b>  | 30 | 70  | 2.5   |
| Poly(isosorbide<br>5-methacrylate-2-<br>acetate)   |    | <b>PIMA</b> | 15 | 85  | 5     |
| Poly(isosorbide<br>5-acrylate)                     |    | <b>PIA</b>  | -  | 100 | 20    |
| Poly(isosorbide<br>5-acrylate-2-<br>acetate)       |  | <b>PIAA</b> | 15 | 85  | 2     |
| Poly(methacrylic<br>acid, sodium salt)<br>solution |  | <b>PMAA</b> | -  | 100 | 132.5 |
| Poly(acrylic acid,<br>sodium salt)<br>solution     |  | <b>PAA</b>  | -  | 100 | 195   |

## DMSO ecotoxicity tests

The potential effect of DMSO on tested organisms was estimated.

**Table S2.** Ecotoxicology results of DMSO on bacterial tests with *E. coli* and *A. fischeri*.

| Test               | Dose,<br>mg L <sup>-1</sup> | Response, % | Mean<br>response, % | Standard<br>deviation |
|--------------------|-----------------------------|-------------|---------------------|-----------------------|
| <i>E. coli</i>     | 3.3·10 <sup>5</sup>         | 58.95       | 56.2                | 2.39                  |
|                    | 3.3·10 <sup>5</sup>         | 54.62       |                     |                       |
|                    | 3.3·10 <sup>5</sup>         | 55.04       |                     |                       |
|                    | 1.65·10 <sup>5</sup>        | 49.61       | 46.47               | 3.72                  |
|                    | 1.65·10 <sup>5</sup>        | 47.45       |                     |                       |
|                    | 1.65·10 <sup>5</sup>        | 42.35       |                     |                       |
|                    | 8.25·10 <sup>4</sup>        | 20.91       | 23.6                | 3.36                  |
|                    | 8.25·10 <sup>4</sup>        | 27.36       |                     |                       |
|                    | 8.25·10 <sup>4</sup>        | 22.52       |                     |                       |
| <i>A. fischeri</i> | 3.3·10 <sup>5</sup>         | 63.5        | 61.27               | 2.01                  |
|                    | 3.3·10 <sup>5</sup>         | 59.6        |                     |                       |
|                    | 3.3·10 <sup>5</sup>         | 60.7        |                     |                       |
|                    | 2.2·10 <sup>5</sup>         | 45.5        | 45.2                | 2.4                   |
|                    | 2.2·10 <sup>5</sup>         | 42.7        |                     |                       |
|                    | 2.2·10 <sup>5</sup>         | 47.4        |                     |                       |
|                    | 1.65·10 <sup>5</sup>        | 32.8        | 34.9                | 2.6                   |
|                    | 1.65·10 <sup>5</sup>        | 34.2        |                     |                       |
|                    | 1.65·10 <sup>5</sup>        | 37.8        |                     |                       |
|                    | 1.1·10 <sup>5</sup>         | 12.9        | 12.93               | 3.3                   |
|                    | 1.1·10 <sup>5</sup>         | 16.2        |                     |                       |
|                    | 1.1·10 <sup>5</sup>         | 9.69        |                     |                       |

## Prediction of EC<sub>50</sub> for monomers.

Modelling was done using Ecological Structure Activity Relationships (ECOSAR) predictive model (Tracy Wright, U.S. EPA Existing Chemicals Risk Assessment Division); a software for estimating a chemical's acute (short-term) toxicity and chronic (long-term or delayed) toxicity to aquatic organisms.

**Table S3.** ECOSAR toxicity prediction for monomers.

| Name       | Organism    | Duration | End Point        | Concentration, mg L <sup>-1</sup> |
|------------|-------------|----------|------------------|-----------------------------------|
| <b>IM</b>  | Fish        | 96 h     | LC <sub>50</sub> | 1960                              |
|            | Daphnid     | 48 h     | LC <sub>50</sub> | 2200                              |
|            | Green Algae | 96 h     | EC <sub>50</sub> | 1920                              |
| <b>IMA</b> | Fish        | 96 h     | LC <sub>50</sub> | 575                               |
|            | Daphnid     | 48 h     | LC <sub>50</sub> | 1570                              |
|            | Green Algae | 96 h     | EC <sub>50</sub> | 1160                              |
| <b>IA</b>  | Fish        | 96 h     | LC <sub>50</sub> | 13.5                              |
|            | Daphnid     | 48 h     | LC <sub>50</sub> | 25.8                              |
|            | Green Algae | 96 h     | EC <sub>50</sub> | 24.2                              |
| <b>IAA</b> | Fish        | 96 h     | LC <sub>50</sub> | 15.0                              |
|            | Daphnid     | 48 h     | LC <sub>50</sub> | 28.7                              |
|            | Green Algae | 96 h     | EC <sub>50</sub> | 25.5                              |

## Values of the mean effective concentration (EC<sub>50</sub>, mg L<sup>-1</sup>) of the tested monomers and polymers with 95% CI values

Confidence interval (CI) is the mean of the estimate plus and minus the variation of the estimate. 95% CI gives 95% certainty that the expected values of the experiment will be within this interval. The 95% CI is calculated by a standard formula:

$$\bar{x} = \pm 1.96 \frac{s}{\sqrt{n}}$$

Where:  $\bar{x}$  – mean value

s – standard deviation

n – sample size

The EC<sub>50</sub> values were determined at 50% response level on the X-axis of the dose-response curves.

**Table S4.** EC<sub>50</sub> values of the tested monomers and polymers with 95% CI values.

| Code name   | <i>Toxi-Chromo Test<sup>TM</sup> E. coli</i>      | <i>WaterTOX<sup>TM</sup> A. fischeri</i>          | <i>DuckWeed Toxkit S. polyrhiza</i>               | <i>Thamnotoxkit T. platyurus</i>                  |
|-------------|---------------------------------------------------|---------------------------------------------------|---------------------------------------------------|---------------------------------------------------|
|             | EC <sub>50</sub> , mg L <sup>-1</sup><br>(95% CI) |
| <b>IM</b>   | 2850<br>(1093; 4606)                              | 1938<br>(1799; 2075)                              | >1000                                             | >1000                                             |
| <b>IMA</b>  | 6100<br>(4431; 7768)                              | 2721<br>(2072; 3371)                              | 139.3<br>(115.8; 162.9)                           | >1000                                             |
| <b>IA</b>   | 16<br>(8.8; 24)                                   | 456<br>(418; 511)                                 | 9<br>(5.8; 12.2)                                  | 8.7<br>(6.5; 11.1)                                |
| <b>IAA</b>  | 125<br>(114; 158)                                 | 585<br>(420; 749)                                 | 9.1<br>(6.8; 11.3)                                | 15.6<br>(8.46; 22.88)                             |
| <b>PIM</b>  | 374<br>(280; 468)                                 | >2000                                             | >1000                                             | >1000                                             |
| <b>PIMA</b> | 1081<br>(800; 1364)                               | 14533<br>(12540; 16525)                           | >1000                                             | >1000                                             |
| <b>PIA</b>  | 12100<br>(5757; 18443)                            | 12533<br>(8357; 16709)                            | >1000                                             | >1000                                             |
| <b>PIAA</b> | 514<br>(433; 595)                                 | >4000                                             | >1000                                             | >1000                                             |
| <b>PMAA</b> | 35650<br>(18611; 52688)                           | 33667<br>(20919; 46414)                           | -                                                 | -                                                 |
| <b>PAA</b>  | 18675<br>(7872; 29477)                            | 45633<br>(40462; 50804)                           | -                                                 | -                                                 |

## Statistical analysis by one-way ANOVA

**Table S5.** One-way ANOVA and post hoc pairwise comparison (Tukey test) between EC<sub>50</sub> values of studied monomers and polymers. *p* values are adjusted for multiple testing.

| <i>p</i> values |                   |                   |                   |                   |                   |                   |                   |                   |                   |             |
|-----------------|-------------------|-------------------|-------------------|-------------------|-------------------|-------------------|-------------------|-------------------|-------------------|-------------|
|                 | <b>IA</b>         | <b>IAA</b>        | <b>IM</b>         | <b>IMA</b>        | <b>PAA</b>        | <b>PIA</b>        | <b>PIAA</b>       | <b>PIM</b>        | <b>PIMA</b>       | <b>PMAA</b> |
| <b>IA</b>       | NA                | NA          |
| <b>IAA</b>      | <i>p</i> > 0.9999 | NA                | NA          |
| <b>IM</b>       | <i>p</i> = 0.1732 | <i>p</i> = 0.2145 | NA                | NA          |
| <b>IMA</b>      | <i>p</i> = 0.0035 | <i>p</i> = 0.0049 | <i>p</i> = 0.9267 | NA                | NA                | NA                | NA                | NA                | NA                | NA          |
| <b>PAA</b>      | <i>p</i> < 0.0001 | <i>p</i> < 0.0001 | <i>p</i> < 0.0001 | <i>p</i> < 0.0001 | NA                | NA                | NA                | NA                | NA                | NA          |
| <b>PIA</b>      | <i>p</i> < 0.0001 | NA                | NA                | NA                | NA                | NA          |
| <b>PIAA</b>     | <i>p</i> = 0.2293 | <i>p</i> = 0.2792 | <i>p</i> > 0.9999 | <i>p</i> = 0.8775 | <i>p</i> < 0.0001 | <i>p</i> < 0.0001 | NA                | NA                | NA                | NA          |
| <b>PIM</b>      | <i>p</i> = 0.7941 | <i>p</i> = 0.8471 | <i>p</i> = 0.9873 | <i>p</i> = 0.3156 | <i>p</i> < 0.0001 | <i>p</i> < 0.0001 | <i>p</i> = 0.9953 | NA                | NA                | NA          |
| <b>PIMA</b>     | <i>p</i> < 0.0001 | <i>p</i> < 0.0001 | <i>p</i> < 0.0001 | <i>p</i> = 0.0396 | <i>p</i> < 0.0001 | <i>p</i> < 0.0001 | <i>p</i> < 0.0001 | <i>p</i> < 0.0001 | NA                | NA          |
| <b>PMAA</b>     | <i>p</i> < 0.0001 | <i>p</i> < 0.0001 | <i>p</i> < 0.0001 | <i>p</i> < 0.0001 | <i>p</i> > 0.9999 | <i>p</i> < 0.0001 | <i>p</i> < 0.0001 | <i>p</i> < 0.0001 | <i>p</i> < 0.0001 | NA          |



## Toxi-Chromo Test™: chromo inhibition test with bacteria *Escherichia coli*

For the instrumental analysis of the results, the absorption at 600 nm was measured on BioTek Synergy™ Mx monochromator-based multi-mode microplate reader.

The results were evaluated according to the standard protocol:

$$TF = 100 - 100[(A_{600S} - A_{600BL_{avg}})/(A_{600NC_{avg}} - A_{600BL_{avg}})]$$

Where: TF – toxicity factor of tested sample

$A_{600S}$  – the value of absorption at 600 nm of test sample

$A_{600BL_{avg}}$  – the average value of absorption at 600 nm for the blank samples

$A_{600NC_{avg}}$  – the average value of absorption at 600 nm for the negative control samples

**Table S6.** Ecotoxicology results of the test compounds on bacteria *E. coli*.

| Code name | Dose, mg L <sup>-1</sup> | Response, % | Mean response, % | Standard deviation |
|-----------|--------------------------|-------------|------------------|--------------------|
| IM        | 12500                    | 71.38       | 77.27            | 4.69               |
|           | 12500                    | 68.01       |                  |                    |
|           | 12500                    | 77.27       |                  |                    |
|           | 6250                     | 67.34       | 65.01            | 2.18               |
|           | 6250                     | 64.65       |                  |                    |
|           | 6250                     | 63.03       |                  |                    |
|           | 3125                     | 49.16       | 48.16            | 7.26               |
|           | 3125                     | 47.16       |                  |                    |
|           | 3125                     | 60.61       |                  |                    |
|           | 1563                     | 37.61       | 41.31            | 5.21               |
|           | 1563                     | 39.06       |                  |                    |
|           | 1563                     | 47.27       |                  |                    |
|           | 781                      | 18.18       | 21.57            | 3.33               |
|           | 781                      | 22.90       |                  |                    |
| 781       | 23.64                    |             |                  |                    |
| IMA       | 40000                    | 88.77       | 84.21            | 2.28               |
|           | 40000                    | 86.19       |                  |                    |
|           | 40000                    | 84.21       |                  |                    |
|           | 20000                    | 76.38       | 78.19            | 4.78               |
|           | 20000                    | 69.16       |                  |                    |
|           | 20000                    | 78.19       |                  |                    |
|           | 10000                    | 60.38       | 63.68            | 2.06               |
|           | 10000                    | 59.87       |                  |                    |
|           | 10000                    | 63.68       |                  |                    |
|           | 5000                     | 49.55       | 45.64            | 3.13               |
|           | 5000                     | 43.35       |                  |                    |
|           | 5000                     | 45.64       |                  |                    |
|           | 2500                     | 41.81       | 39.85            | 2.27               |
|           | 2500                     | 44.39       |                  |                    |
| 2500      | 39.85                    |             |                  |                    |

|                |       |        |        |      |
|----------------|-------|--------|--------|------|
| <b>IAA</b>     | 1000  | 99.18  | 98.37  | 0.82 |
|                | 1000  | 97.55  |        |      |
|                | 1000  | 98.37  |        |      |
|                | 500   | 95.91  | 94.69  | 1.22 |
|                | 500   | 94.69  |        |      |
|                | 500   | 93.47  |        |      |
|                | 250   | 80.82  | 77.28  | 4.19 |
|                | 250   | 72.65  |        |      |
|                | 250   | 78.37  |        |      |
|                | 125   | 56.32  | 50.88  | 4.73 |
|                | 125   | 47.75  |        |      |
|                | 125   | 48.57  |        |      |
|                | 62.5  | 33.06  | 31.29  | 4.93 |
|                | 62.5  | 35.10  |        |      |
| 62.5           | 25.71 |        |        |      |
| <b>IA</b>      | 78    | 95.68  | 94.56  | 2.22 |
|                | 78    | 92     |        |      |
|                | 78    | 96     |        |      |
|                | 39    | 77.07  | 73.28  | 3.87 |
|                | 39    | 69.33  |        |      |
|                | 39    | 73.33  |        |      |
|                | 19.5  | 60.47  | 58.38  | 7.55 |
|                | 19.5  | 50     |        |      |
|                | 19.5  | 64.67  |        |      |
|                | 9.75  | 27.91  | 28     | 6.05 |
|                | 9.75  | 23.33  |        |      |
|                | 9.75  | 35.33  |        |      |
|                | 4.8   | 21.93  | 21.53  | 3.35 |
|                | 4.8   | 18     |        |      |
| 4.8            | 24.67 |        |        |      |
| <b>PIM(a)</b>  | 1000  | 82.65  | 84.85  | 3.11 |
|                | 1000  | 87.05  |        |      |
|                | 500   | 56.77  | 57.04  | 0.38 |
|                | 500   | 57.31  |        |      |
|                | 250   | 49.33  | 46.44  | 4.09 |
|                | 250   | 43.54  |        |      |
|                | 125   | 18.76  | 17.8   | 1.36 |
|                | 125   | 16.83  |        |      |
|                | 62.5  | 0.86   | 1.41   | 0.78 |
|                | 62.5  | 1.97   |        |      |
| <b>PIM(b)</b>  | 2500  | 122.01 | 124.9  | 4.97 |
|                | 2500  | 122.03 |        |      |
|                | 2500  | 130.62 |        |      |
|                | 1250  | 74.64  | 77     | 2.19 |
|                | 1250  | 78.94  |        |      |
|                | 1250  | 77.51  |        |      |
|                | 625   | 70.33  | 65.6   | 7.08 |
|                | 625   | 57.41  |        |      |
|                | 625   | 68.89  |        |      |
|                | 312.5 | 48.80  | 46.4   | 2.98 |
|                | 312.5 | 47.36  |        |      |
|                | 312.5 | 43.06  |        |      |
| <b>PIMA(a)</b> | 3125  | 98.08  | 103.33 | 4.55 |
|                | 3125  | 105.74 |        |      |
|                | 3125  | 106.18 |        |      |

|                |       |       |       |       |      |
|----------------|-------|-------|-------|-------|------|
|                | 1563  | 65.9  | 68.47 | 7.21  |      |
|                | 1563  | 76.63 |       |       |      |
|                | 1563  | 62.89 |       |       |      |
|                |       | 781   | 30.65 | 37.87 | 7.83 |
|                |       | 781   | 36.78 |       |      |
|                |       | 781   | 46.02 |       |      |
|                |       | 391   | 24.52 | 20.42 | 3.86 |
|                |       | 391   | 19.92 |       |      |
|                |       | 391   | 16.83 |       |      |
| <b>PIMA(b)</b> | 5000  | 80.35 | 83.68 | 4.71  |      |
|                | 5000  | 87.01 |       |       |      |
|                | 2500  | 58.75 | 57.91 | 1.19  |      |
|                | 2500  | 57.06 |       |       |      |
|                | 1250  | 59.65 | 51.83 | 1.66  |      |
|                | 1250  | 53.01 |       |       |      |
|                | 625   | 22.71 | 21.76 | 1.34  |      |
|                | 625   | 20.81 |       |       |      |
|                | 312.5 | 18.73 | 17.71 | 1.46  |      |
|                | 312.5 | 16.67 |       |       |      |
| <b>PIMA(c)</b> | 5000  | 87.02 | 86.34 | 0.96  |      |
|                | 5000  | 85.66 |       |       |      |
|                | 2500  | 59.65 | 63.16 | 4.96  |      |
|                | 2500  | 66.66 |       |       |      |
|                | 1250  | 29.19 | 34.03 | 6.94  |      |
|                | 1250  | 38.94 |       |       |      |
|                | 625   | 28.42 | 24.73 | 5.21  |      |
|                | 625   | 21.05 |       |       |      |
|                | 312.5 | 11.22 | 15.08 | 5.45  |      |
|                | 312.5 | 18.94 |       |       |      |
| <b>PIAA</b>    | 1000  | 64    | 71.89 | 14.21 |      |
|                | 1000  | 63.38 |       |       |      |
|                | 1000  | 88.31 |       |       |      |
|                | 500   | 48.61 | 52.1  | 4.54  |      |
|                | 500   | 50.46 |       |       |      |
|                | 500   | 57.23 |       |       |      |
|                | 250   | 33.84 | 34.67 | 6.81  |      |
|                | 250   | 28.31 |       |       |      |
|                | 250   | 41.85 |       |       |      |
|                | 125   | 25.84 | 26.05 | 3.39  |      |
|                | 125   | 22.77 |       |       |      |
|                | 125   | 29.54 |       |       |      |
| <b>PIA(a)</b>  | 20000 | 57.71 | 61.86 | 3.99  |      |
|                | 20000 | 65.67 |       |       |      |
|                | 20000 | 62.19 |       |       |      |
|                | 10000 | 41.79 | 46.27 | 4.25  |      |
|                | 10000 | 50.25 |       |       |      |
|                | 10000 | 46.76 |       |       |      |
|                | 5000  | 27.36 | 29.02 | 4.69  |      |
|                | 5000  | 34.33 |       |       |      |
|                | 5000  | 25.38 |       |       |      |
|                | 2500  | 25.87 | 27.19 | 4.62  |      |
|                | 2500  | 32.34 |       |       |      |
| 2500           | 23.58 |       |       |       |      |
| <b>PIA(b)</b>  | 20000 | 62.02 | 64.93 | 4.11  |      |
|                | 20000 | 67.83 |       |       |      |

|               |        |       |       |       |
|---------------|--------|-------|-------|-------|
|               | 10000  | 24.98 | 23.76 | 1.72  |
|               | 10000  | 22.54 |       |       |
|               | 5000   | 17.11 | 16.33 | 1.08  |
|               | 5000   | 15.57 |       |       |
|               | 2500   | 10.96 | 11.07 | 0.15  |
|               | 2500   | 11.18 |       |       |
| <b>PIA(c)</b> | 20000  | 55.14 | 53.88 | 1.78  |
|               | 20000  | 52.62 |       |       |
|               | 10000  | 15.53 | 16.68 | 1.63  |
|               | 10000  | 17.83 |       |       |
|               | 5000   | 4.88  | 4.55  | 0.46  |
|               | 5000   | 4.22  |       |       |
|               | 2500   | 1.59  | 2.11  | 0.72  |
|               | 2500   | 2.61  |       |       |
| <b>PMAA</b>   | 195000 | 99.51 | 98.43 | 0.99  |
|               | 195000 | 97.56 |       |       |
|               | 195000 | 98.21 |       |       |
|               | 97500  | 90.73 | 85.85 | 6.9   |
|               | 97500  | 80.98 |       |       |
|               | 97500  | 89.33 |       |       |
|               | 48750  | 75.12 | 66.34 | 12.42 |
|               | 48750  | 57.56 |       |       |
|               | 48750  | 68.18 |       |       |
|               | 24375  | 40.98 | 38.05 | 4.14  |
|               | 24375  | 35.12 |       |       |
|               | 24375  | 40.23 |       |       |
|               | 12187  | 24.39 | 21.51 | 2.84  |
|               | 12187  | 18.71 |       |       |
| 12187         | 21.42  |       |       |       |
| <b>PAA</b>    | 132500 | 90.77 | 92.04 | 2.9   |
|               | 132500 | 90.52 |       |       |
|               | 132500 | 89.74 |       |       |
|               | 66250  | 78.48 | 81.14 | 4.3   |
|               | 66250  | 77.69 |       |       |
|               | 66250  | 87.18 |       |       |
|               | 33125  | 62    | 58.84 | 3.86  |
|               | 33125  | 62.26 |       |       |
|               | 33125  | 56.41 |       |       |
|               | 16562  | 41.33 | 43.75 | 2.87  |
|               | 16562  | 43.43 |       |       |
|               | 16562  | 42.39 |       |       |
|               | 8281   | 19.08 | 22.56 | 4.44  |
|               | 8281   | 29.06 |       |       |
| 8281          | 20.73  |       |       |       |

## Water-TOX™ STD: luminescence inhibition test with bacteria *Aliivibrio fischeri*

The luminescence intensity was measured in GloMax® 20/20 Luminometer.

The results were evaluated according to ISO 11348-3 as follows:

- 1)  $KF = IC_t/IC_0$
- 2)  $INH\% = 100 - 100[IT_t/(KF \times IT_0)]$

Where: KF – Correction factor

$IC_t$  – Luminescence intensity of negative control after contact time

$IC_0$  – Initial luminescence intensity of control sample

INH% – Inhibition percentage of luminescence

$IT_t$  – Luminescence intensity of test sample after contact time

$IT_0$  – Initial luminescence intensity of test sample

**Table S7.** Ecotoxicology results of the test compounds on bacteria *A. fischeri*.

| Code name | Dose, mg L <sup>-1</sup> | Response, % | Mean response, % | Standard deviation |      |
|-----------|--------------------------|-------------|------------------|--------------------|------|
| IM        | 5200                     | 78.13       | 81.21            | 2.69               |      |
|           | 5200                     | 82.35       |                  |                    |      |
|           | 5200                     | 83.15       |                  |                    |      |
|           | 3500                     | 3500        | 70.93            | 74.46              | 4.75 |
|           |                          | 3500        | 79.86            |                    |      |
|           |                          | 3500        | 72.59            |                    |      |
|           | 2100                     | 2100        | 54.78            | 53.56              | 1.19 |
|           |                          | 2100        | 53.51            |                    |      |
|           |                          | 2100        | 52.39            |                    |      |
|           | 1750                     | 1750        | 45.09            | 45.52              | 2.37 |
|           |                          | 1750        | 48.08            |                    |      |
|           |                          | 1750        | 43.41            |                    |      |
| 875       | 875                      | 35.88       | 35.71            | 2.33               |      |
|           | 875                      | 37.93       |                  |                    |      |
|           | 875                      | 33.28       |                  |                    |      |
| IMA       | 7500                     | 91.2        | 89.82            | 1.24               |      |
|           | 7500                     | 89.49       |                  |                    |      |
|           | 7500                     | 88.77       |                  |                    |      |
|           | 3750                     | 3750        | 59.68            | 65.37              | 6.35 |
|           |                          | 3750        | 64.21            |                    |      |
|           |                          | 3750        | 72.24            |                    |      |
|           | 1875                     | 1875        | 38.01            | 32.89              | 8.56 |
|           |                          | 1875        | 23.02            |                    |      |
| 1875      |                          | 37.67       |                  |                    |      |

|             |       |       |       |      |
|-------------|-------|-------|-------|------|
|             | 937.5 | 17.66 | 19.14 | 4.46 |
|             | 937.5 | 15.62 |       |      |
|             | 937.5 | 24.15 |       |      |
|             | 468.7 | 8.25  | 7.01  | 1.08 |
|             | 468.7 | 6.55  |       |      |
|             | 468.7 | 6.24  |       |      |
| <b>IA</b>   | 1000  | 95.38 | 92.77 | 2.31 |
|             | 1000  | 91.96 |       |      |
|             | 1000  | 90.97 |       |      |
|             | 500   | 78.52 | 76.29 | 4.11 |
|             | 500   | 71.55 |       |      |
|             | 500   | 78.81 |       |      |
|             | 250   | 26.21 | 26.51 | 3.58 |
|             | 250   | 30.22 |       |      |
|             | 250   | 23.07 |       |      |
|             | 125   | 17.01 | 14.81 | 2.08 |
|             | 125   | 12.88 |       |      |
|             | 125   | 14.52 |       |      |
| <b>IAA</b>  | 1000  | 89.62 | 92.01 | 2.87 |
|             | 1000  | 95.19 |       |      |
|             | 1000  | 91.22 |       |      |
|             | 600   | 50.36 | 46.19 | 5.21 |
|             | 600   | 47.88 |       |      |
|             | 600   | 40.34 |       |      |
|             | 500   | 41.65 | 35.5  | 7.6  |
|             | 500   | 37.85 |       |      |
|             | 500   | 26.99 |       |      |
|             | 250   | 9.93  | 7.89  | 1.76 |
|             | 250   | 7.51  |       |      |
|             | 250   | 6.49  |       |      |
| <b>PIMA</b> | 20000 | 91.4  | 89.3  | 2.9  |
|             | 20000 | 87.3  |       |      |
|             | 16000 | 53.6  | 56.1  | 3.5  |
|             | 16000 | 58.6  |       |      |
|             | 13000 | 41.6  | 45.5  | 5.5  |
|             | 13000 | 49.4  |       |      |
|             | 8000  | 9.5   | 10.3  | 1.2  |
|             | 8000  | 11.2  |       |      |
|             | 3000  | 1.5   | 1.9   | 0.6  |
|             | 3000  | 2.3   |       |      |
| <b>PIA</b>  | 20000 | 86.9  | 85.4  | 2.8  |
|             | 20000 | 87.1  |       |      |
|             | 20000 | 82.2  |       |      |
|             | 10000 | 47.2  | 37.8  | 8.1  |
|             | 10000 | 33.4  |       |      |
|             | 10000 | 33.1  |       |      |
|             | 5000  | 17.4  | 21.1  | 3.2  |
|             | 5000  | 23.1  |       |      |

|        |       |           |      |       |
|--------|-------|-----------|------|-------|
|        | 5000  | 22.9      | 11.1 | 4.9   |
|        | 2500  | 14.6      |      |       |
|        | 2500  | 5.5       |      |       |
|        | 2500  | 13.1      | 6.8  | 2.6   |
|        | 1250  | 9.2       |      |       |
|        | 1250  | 6.7       |      |       |
|        | 1250  | 4.5       | PMAA | 53.46 |
| 39000  | 58.06 |           |      |       |
| 39000  | 50.33 |           |      |       |
| 39000  | 51.99 | 43.74     |      | 2.1   |
| 19500  | 45.77 |           |      |       |
| 19500  | 41.64 |           |      |       |
| 19500  | 43.81 | 36.04     |      | 1.5   |
| 9750   | 34.36 |           |      |       |
| 9750   | 37.35 |           |      |       |
| 9750   | 36.4  | 30.35     |      | 1.8   |
| 4875   | 31.03 |           |      |       |
| 4875   | 31.73 |           |      |       |
| 4875   | 28.31 | 26.57     |      | 0.8   |
| 2437   | 26.1  |           |      |       |
| 2437   | 26.19 |           |      |       |
| 2437   | 27.44 | PAA       | 60.3 | 1.1   |
| 53000  | 59.6  |           |      |       |
| 53000  | 59.7  |           |      |       |
| 53000  | 61.1  |           | 25.1 | 6.1   |
| 26500  | 23.3  |           |      |       |
| 26500  | 20.03 |           |      |       |
| 26500  | 31.8  |           | 18.3 | 0.14  |
| 13250  | 18.4  |           |      |       |
| 13250  | 18.1  |           |      |       |
| 13250  | 18.3  |           | 9.9  | 1.2   |
| 6625   | 9.3   |           |      |       |
| 6625   | 11.3  |           |      |       |
| 6625   | 9.2   |           | 18.7 | 2.9   |
| 3312   | 18.6  |           |      |       |
| 3312   | 15.9  |           |      |       |
| 3312   | 21.7  | IMA-latex | 82.1 | 3.3   |
| 500000 | 79.5  |           |      |       |
| 500000 | 86.1  |           |      |       |
| 500000 | 82.1  |           | 66.9 | 0.5   |
| 250000 | 65.9  |           |      |       |
| 250000 | 66.5  |           |      |       |
| 250000 | 66.9  |           | 45.5 | 1.5   |
| 125000 | 42.6  |           |      |       |
| 125000 | 43.8  |           |      |       |
| 125000 | 45.6  |           | 23.5 | 2.7   |
| 62500  | 24.4  |           |      |       |
| 62500  | 28.7  |           |      |       |

|                  |        |       |      |     |
|------------------|--------|-------|------|-----|
|                  | 62500  | 23.5  |      |     |
|                  | 31000  | 17.7  |      |     |
|                  | 31000  | 21.6  | 21.9 | 2.3 |
|                  | 31000  | 21.9  |      |     |
| <b>IMP-latex</b> | 500000 | 92.6  | 91.5 | 2.7 |
|                  | 500000 | 88.4  |      |     |
|                  | 500000 | 93.6  |      |     |
|                  | 250000 | 48.03 | 50.5 | 4.8 |
|                  | 250000 | 47.3  |      |     |
|                  | 250000 | 56.1  |      |     |
|                  | 125000 | 43.9  | 39.7 | 4.7 |
|                  | 125000 | 34.5  |      |     |
|                  | 125000 | 40.7  |      |     |
|                  | 62500  | 36.5  | 32.6 | 3.5 |
|                  | 62500  | 30.8  |      |     |
|                  | 62500  | 30.3  |      |     |
|                  | 31000  | 30.2  | 30.3 | 1.6 |
|                  | 31000  | 31.9  |      |     |
|                  | 31000  | 28.6  |      |     |
| <b>IMB-latex</b> | 500000 | 49.7  | 55.9 | 6.3 |
|                  | 500000 | 62.3  |      |     |
|                  | 500000 | 55.6  |      |     |
|                  | 250000 | 32.5  | 31.1 | 1.9 |
|                  | 250000 | 31.8  |      |     |
|                  | 250000 | 28.9  |      |     |
|                  | 125000 | 20.5  | 22.9 | 2.5 |
|                  | 125000 | 25.4  |      |     |
|                  | 125000 | 23.3  |      |     |
|                  | 62500  | 15.5  | 16.6 | 1.6 |
|                  | 62500  | 18.4  |      |     |
|                  | 62500  | 16.1  |      |     |
|                  | 31000  | 15.5  | 17.4 | 1.7 |
|                  | 31000  | 18.8  |      |     |
|                  | 31000  | 17.9  |      |     |



## DuckWeed Toxkit F: growth inhibition test with vascular plants *Spirodela polyrhiza*

The 72 h EC<sub>50</sub> is the concentration of tested substances that will affect 50% of the vegetative buds in the test population after 3 days of exposure to samples.

Percent inhibition of growth rate ( $I_r$ ) were calculated for each test concentration according to the following formula:

$$I_r = \frac{\mu C - \mu T}{\mu C} \times 100\%$$

Where:  $I_r$  – percent inhibition in average specific growth rate

$m$  – the size of the vegetative buds measured by Image Analysis software

$mC$  – mean value for  $\mu$  in the control

$mT$  – mean value for  $\mu$  in the treatment group

**Table S8.** Ecotoxicology results of the test compounds on vascular plants *S. polyrhiza*.

| Code name  | Dose, mg L <sup>-1</sup> | Response, % | Mean response, % | Standard deviation |
|------------|--------------------------|-------------|------------------|--------------------|
| <b>IM</b>  | 1                        | 98.4        | 101.4            | 11.8               |
|            | 1                        | 114.5       |                  |                    |
|            | 1                        | 91.4        |                  |                    |
|            | 10                       | 102.1       | 87.6             | 15.7               |
|            | 10                       | 89.8        |                  |                    |
|            | 10                       | 70.9        |                  |                    |
|            | 25                       | 86.8        | 80.4             | 8.9                |
|            | 25                       | 74.2        |                  |                    |
|            | 50                       | 83.3        | 93               | 13.7               |
|            | 50                       | 102.7       |                  |                    |
|            | 100                      | 104.5       | 90.9             | 111.8              |
|            | 100                      | 82.7        |                  |                    |
| 100        | 85.8                     |             |                  |                    |
| <b>IMA</b> | 10                       | 82.2        | 93.7             | 10                 |
|            | 10                       | 99.3        |                  |                    |
|            | 10                       | 99.7        |                  |                    |
|            | 50                       | 73.8        | 72.7             | 1.5                |
|            | 50                       | 71.6        |                  |                    |
|            | 100                      | 62.2        | 54.6             | 6.7                |
|            | 100                      | 51.8        |                  |                    |
|            | 100                      | 49.7        |                  |                    |
|            | 500                      | 10.5        | 11               | 0.8                |
| 500        | 11.6                     |             |                  |                    |

|             |       |       |       |      |
|-------------|-------|-------|-------|------|
|             | 1000  | 7.7   | 7.2   | 0.7  |
|             | 1000  | 6.7   |       |      |
| <b>IA</b>   | 1     | 103.3 | 102.9 | 4.1  |
|             | 1     | 106.8 |       |      |
|             | 1     | 98.5  |       |      |
|             | 10    | 56.3  | 46.3  | 9.5  |
|             | 10    | 45.3  |       |      |
|             | 10    | 37.3  |       |      |
|             | 25    | 21.1  | 19.4  | 2.3  |
|             | 25    | 17.7  |       |      |
|             | 50    | 1.8   | 3.3   | 1.4  |
|             | 50    | 4.8   |       |      |
|             | 50    | 3.2   |       |      |
| <b>IAA</b>  | 1     | 100.7 | 100.4 | 6.6  |
|             | 1     | 93.7  |       |      |
|             | 1     | 106.9 |       |      |
|             | 10    | 68.4  | 52.9  | 13.4 |
|             | 10    | 44.9  |       |      |
|             | 10    | 45.3  |       |      |
|             | 25    | 22.5  | 21.8  | 1.03 |
|             | 25    | 21.1  |       |      |
|             | 50    | 11.3  | 11.7  | 0.7  |
|             | 50    | 12.2  |       |      |
|             | 100   | 8.2   | 5.9   | 2.1  |
|             | 100   | 5.4   |       |      |
| 100         | 4.0   |       |       |      |
| <b>PIM</b>  | 1     | 102.7 | 102.9 | 2.1  |
|             | 1     | 105.3 |       |      |
|             | 1     | 100.9 |       |      |
|             | 10    | 83.5  | 91.9  | 8.3  |
|             | 10    | 100.2 |       |      |
|             | 10    | 92.2  |       |      |
|             | 25    | 99.5  | 101.3 | 12.3 |
|             | 25    | 95.7  |       |      |
|             | 25    | 108.7 |       |      |
|             | 100   | 96.1  | 113.9 | 15.7 |
|             | 100   | 120   |       |      |
| 100         | 125.7 |       |       |      |
| <b>PIMA</b> | 1     | 89.2  | 92.6  | 3.4  |
|             | 1     | 96.1  |       |      |
|             | 1     | 92.7  |       |      |
|             | 10    | 86.8  | 88.7  | 2.7  |
|             | 10    | 90.7  |       |      |
|             | 25    | 122.5 | 120.5 | 2.8  |
|             | 25    | 118.5 |       |      |
|             | 100   | 77.6  | 107   | 32.2 |
|             | 100   | 108   |       |      |
|             | 100   | 142.3 |       |      |

|            |             |       |       |      |
|------------|-------------|-------|-------|------|
|            | 1000        | 73.5  | 73.8  | 0.4  |
|            | 1000        | 74.1  |       |      |
| <b>PIA</b> | 0.1         | 105.9 | 105.9 | 0.06 |
|            | 0.1         | 106.1 |       |      |
|            | 1           | 138.8 | 133.9 | 6.9  |
|            | 1           | 129.1 |       |      |
|            | 10          | 128.3 | 130.3 | 2.8  |
|            | 10          | 132.3 |       |      |
|            | 100         | 125.2 | 123.7 | 2.7  |
|            | 100         | 121.3 |       |      |
|            | 1000        | 126.6 | 126.6 | 2.01 |
|            | 1000        | 129.5 |       |      |
|            | <b>PIAA</b> | 0.1   | 96.1  | 92.1 |
| 0.1        |             | 88.1  |       |      |
| 1          |             | 102.2 | 105.4 | 3.5  |
| 1          |             | 104.4 |       |      |
| 1          |             | 109.1 |       |      |
| 10         |             | 109.1 | 106.9 | 5.9  |
| 10         |             | 100.2 |       |      |
| 10         |             | 111.3 |       |      |
| 100        |             | 89.1  | 90.1  | 2.9  |
| 100        |             | 87.9  |       |      |
| 100        |             | 93.4  |       |      |
| 1000       |             | 74.1  | 73.6  | 0.6  |
| 1000       |             | 73.2  |       |      |

**Thamnotoxkit F: crustacean toxicity screening test with invertebrates *Thamnocephalus platyurus***

To estimate the amount of alive and dead crustaceans dissection microscope was used. Percent mortalities were calculated for each test concentration according to the following formula:

$$\%mortality = \frac{Nd}{NT} \times 100\%$$

Where: Nd – total number of dead crustaceans

NT – total number of tested crustaceans

**Table S9.** Ecotoxicology results of the test compounds on invertebrates *T. platyurus*.

| Code name  | Dose, mg L <sup>-1</sup> | Response, % | Mean response, % | Standard deviation |
|------------|--------------------------|-------------|------------------|--------------------|
| <b>IA</b>  | 5                        | 8           | 10.6             | 6.4                |
|            | 5                        | 6           |                  |                    |
|            | 5                        | 18.75       |                  |                    |
|            | 10                       | 63.6        | 58.8             | 6.5                |
|            | 10                       | 51.3        |                  |                    |
|            | 10                       | 61.5        |                  |                    |
|            | 25                       | 100         | -                | -                  |
|            | 25                       | 100         |                  |                    |
|            | 50                       | 100         | -                | -                  |
|            | 50                       | 100         |                  |                    |
| <b>IAA</b> | 10                       | 18.8        | 14.6             | 3.6                |
|            | 10                       | 12.9        |                  |                    |
|            | 10                       | 12.1        |                  |                    |
|            | 12                       | 29.4        | 30.7             | 1.9                |
|            | 12                       | 32.1        |                  |                    |
|            | 15                       | 56.2        | 61.5             | 4.8                |
|            | 15                       | 63.4        |                  |                    |
|            | 15                       | 65          |                  |                    |
|            | 25                       | 100         | -                | -                  |
|            | 25                       | 100         |                  |                    |
|            | 25                       | 100         |                  |                    |

# Technical Data Sheet of CHP BAR 1400

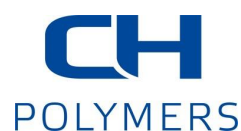

Technical Data Sheet and  
Product Specification

## CHP BAR 1400

|                                          |                                                                                                                                                                                                                                                                                                                                                                                                                                                                                                                                                                                                                                                                                                                                              |             |
|------------------------------------------|----------------------------------------------------------------------------------------------------------------------------------------------------------------------------------------------------------------------------------------------------------------------------------------------------------------------------------------------------------------------------------------------------------------------------------------------------------------------------------------------------------------------------------------------------------------------------------------------------------------------------------------------------------------------------------------------------------------------------------------------|-------------|
| <b>Description</b>                       | Anionic aqueous dispersion of styrene acrylate copolymer for barrier coating of paper and board.                                                                                                                                                                                                                                                                                                                                                                                                                                                                                                                                                                                                                                             |             |
| <b>Application</b>                       | CHP BAR 1400 is a barrier binder for general purposes. It gives good balance of properties regarding water, water vapour and grease resistance. The binder is stable against yellowing induced by heat and UV-light.<br><br>The product complies with FDA (§ 176.170 and 176.180) and BfR XIV and XXXVI requirements.                                                                                                                                                                                                                                                                                                                                                                                                                        |             |
| <b>Specification</b>                     | Solids content, %                                                                                                                                                                                                                                                                                                                                                                                                                                                                                                                                                                                                                                                                                                                            | 50 ± 1      |
|                                          | pH                                                                                                                                                                                                                                                                                                                                                                                                                                                                                                                                                                                                                                                                                                                                           | 7 ± 1       |
|                                          | Brookfield viscosity, mPas<br>(LVTDV – II, 60 rpm, spindle 2)                                                                                                                                                                                                                                                                                                                                                                                                                                                                                                                                                                                                                                                                                | < 500       |
| <b>Characteristics of the dispersion</b> | Appearance                                                                                                                                                                                                                                                                                                                                                                                                                                                                                                                                                                                                                                                                                                                                   | milky white |
|                                          | Stabilization                                                                                                                                                                                                                                                                                                                                                                                                                                                                                                                                                                                                                                                                                                                                | anionic     |
|                                          | Density (g/cm <sup>3</sup> )                                                                                                                                                                                                                                                                                                                                                                                                                                                                                                                                                                                                                                                                                                                 | 1,0         |
| <b>Packaging, storage &amp; safety</b>   | <b>CHP BAR 1400</b> is supplied in bulk by road tanker. Consult us about delivery in containers or drums.<br><br>The dispersion should be kept in the original containers or in stainless steel, aluminium or plastic tanks. Ordinary steel tanks with a corrosion -proof lining can also be used. The containers should be kept closed to prevent evaporation of the water and the formation of a skin on the surface. The product should not be exposed to frost or to temperatures exceeding 30°C. Under normal conditions, the product can be stored for six months with no significant loss of its properties, but it cannot be guaranteed for a longer time.<br><br>For safety issues, please refer to the material safety data sheet. |             |
| <b>Technical Service</b>                 | Trained and experienced field sales and technical service representatives of CH-Polymers are ready to provide advice and assistance with laboratory tests and plant trials, to determine the best application conditions.                                                                                                                                                                                                                                                                                                                                                                                                                                                                                                                    |             |
| <b>Contact</b>                           | <b>CH-Polymers Oy</b><br>Tel. +358 9 5024 4150<br>Info@ch-polymers.com<br><a href="http://www.ch-polymers.com">www.ch-polymers.com</a>                                                                                                                                                                                                                                                                                                                                                                                                                                                                                                                                                                                                       |             |

This information is based on our laboratory tests, experience and best knowledge for the moment. We recommend that the prospective user determine the usage of our raw materials and recommendations before adopting them on a commercial scale.

## References

1. L. Matt, J. Parve, O. Parve, T. Pehk, T. H. Pham, I. Liblikas, L. Vares and P. Jannasch, *ACS Sustainable Chem. Eng.*, 2018, **6**, 17382-17390.
2. S. Laanesoo, O. Bonjour, J. Parve, O. Parve, L. Matt, L. Vares and P. Jannasch, *Biomacromolecules*, 2021, **22**, 640-648.
3. F. Nonque, A. Sahut, N. Jacquet, R. Saint-Loup, P. Woisel and J. Potier, *Polym. Chem.*, 2020, **11**, 6903-6909.
4. J. J. Gallagher, M. A. Hillmyer and T. M. Reineke, *ACS Sustainable Chem. Eng.*, 2016, **4**, 3379-3387.
